# Supplementary material for: Genomic alterations in KMT2 family predict outcome of immune checkpoint therapy in multiple cancers
Source: Springer Nature journal article supplement (doi:10.1186/s13045-021-01050-0), 2021-03-02
Supplement: MOESM2 [file 18921300]

**Supplementary Table 1. The estimated odds ratio of high-frequency gene mutations as predictive marker in ICT pooled cohort**

| Gene               | Mutation Frequency | Odds Ratio (95% CI)                |                         |                         | P-value         |
|--------------------|--------------------|------------------------------------|-------------------------|-------------------------|-----------------|
|                    |                    | Fixed effects<br>(Mantel-Haenszel) | NSCLC                   | Melanoma                |                 |
| <b>KMT2 family</b> | <b>0.31</b>        | <b>2.60 (1.66-4.07)</b>            | <b>3.82 (1.65-8.85)</b> | <b>2.21 (1.29-3.78)</b> | <b>1.67E-04</b> |
| TTN                | 0.64               | 2.08 (1.29,3.36)                   | 2.11 (1.04-4.28)        | 2.06 (1.08-3.94)        | 2.85E-02        |
| MUC16              | 0.58               | 1.86 (1.17,2.97)                   | 2.13 (1.02-4.45)        | 1.71 (0.94-3.12)        | 1.36E-01        |
| LRP1B              | 0.33               | 2.13 (1.37,3.31)                   | 2.65 (1.19-5.89)        | 1.93 (1.13-3.29)        | 3.53E-03        |
| USH2A              | 0.33               | 2.04 (1.31,3.18)                   | 4.61 (1.95-10.86)       | 1.47 (0.86-2.51)        | 6.82E-03        |
| CSMD3              | 0.31               | 1.76 (1.13,2.74)                   | 1.43 (0.67-3.05)        | 1.97 (1.14-3.38)        | 1.70E-02        |
| RYR2               | 0.27               | 2.18 (1.38,3.45)                   | 2.65 (1.27-5.53)        | 1.92 (1.07-3.45)        | 3.41E-04        |
| ZFHX4              | 0.24               | 2.39 (1.5,3.83)                    | 4.97 (2.11-11.70)       | 1.66 (0.93-2.98)        | 3.45E-04        |
| SYNE1              | 0.21               | 2.65 (1.6,4.39)                    | 4.57 (1.52-13.72)       | 2.23 (1.25-3.97)        | 1.03E-03        |
| RYR3               | 0.21               | 1.45 (0.87,2.43)                   | 2.69 (0.91-7.92)        | 1.20 (0.66-2.17)        | 3.64E-01        |
| KMT2C              | 0.15               | 3.48 (1.98,6.12)                   | 4.67 (1.40-15.57)       | 3.15 (1.66-5.99)        | 5.46E-05        |
| FAM135B            | 0.15               | 1.33 (0.75,2.37)                   | 1.74 (0.59-5.12)        | 1.19 (0.60-2.37)        | 4.60E-01        |

P-value was estimated by Fisher's exact test
