# Supplementary material for: Genomic alterations in KMT2 family predict outcome of immune checkpoint therapy in multiple cancers
Source: Springer Nature journal article supplement (doi:10.1186/s13045-021-01050-0), 2021-03-02

**Differential Gene expression**

KMT2-MUT / KMT2-WT

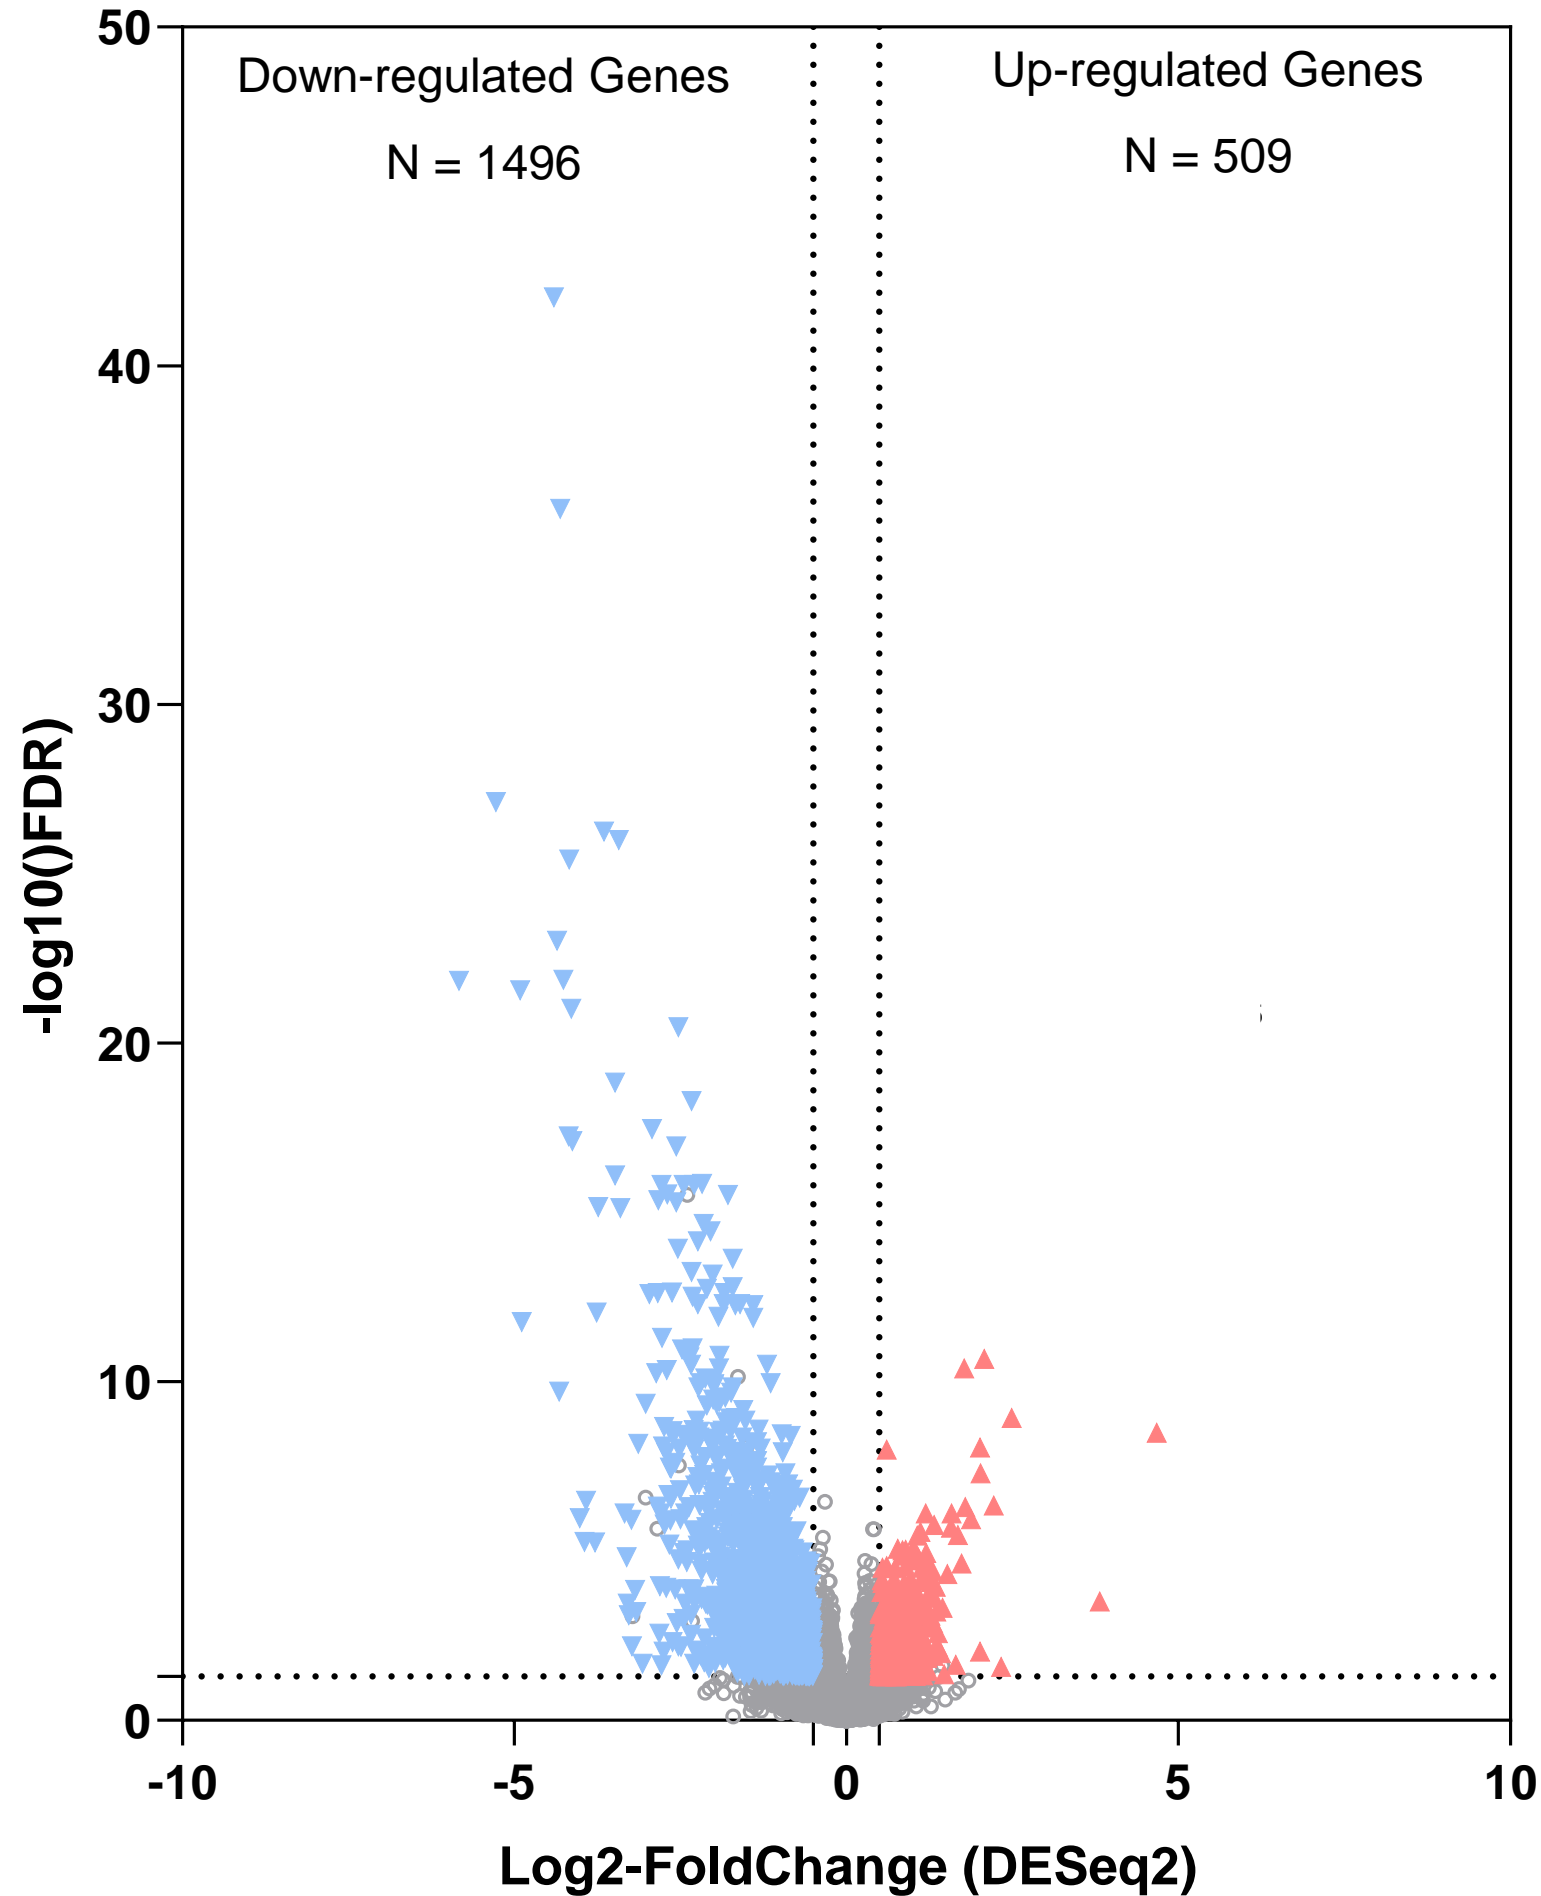**Top20 Enriched Gene Ontology Terms (UP-regulated Genes)**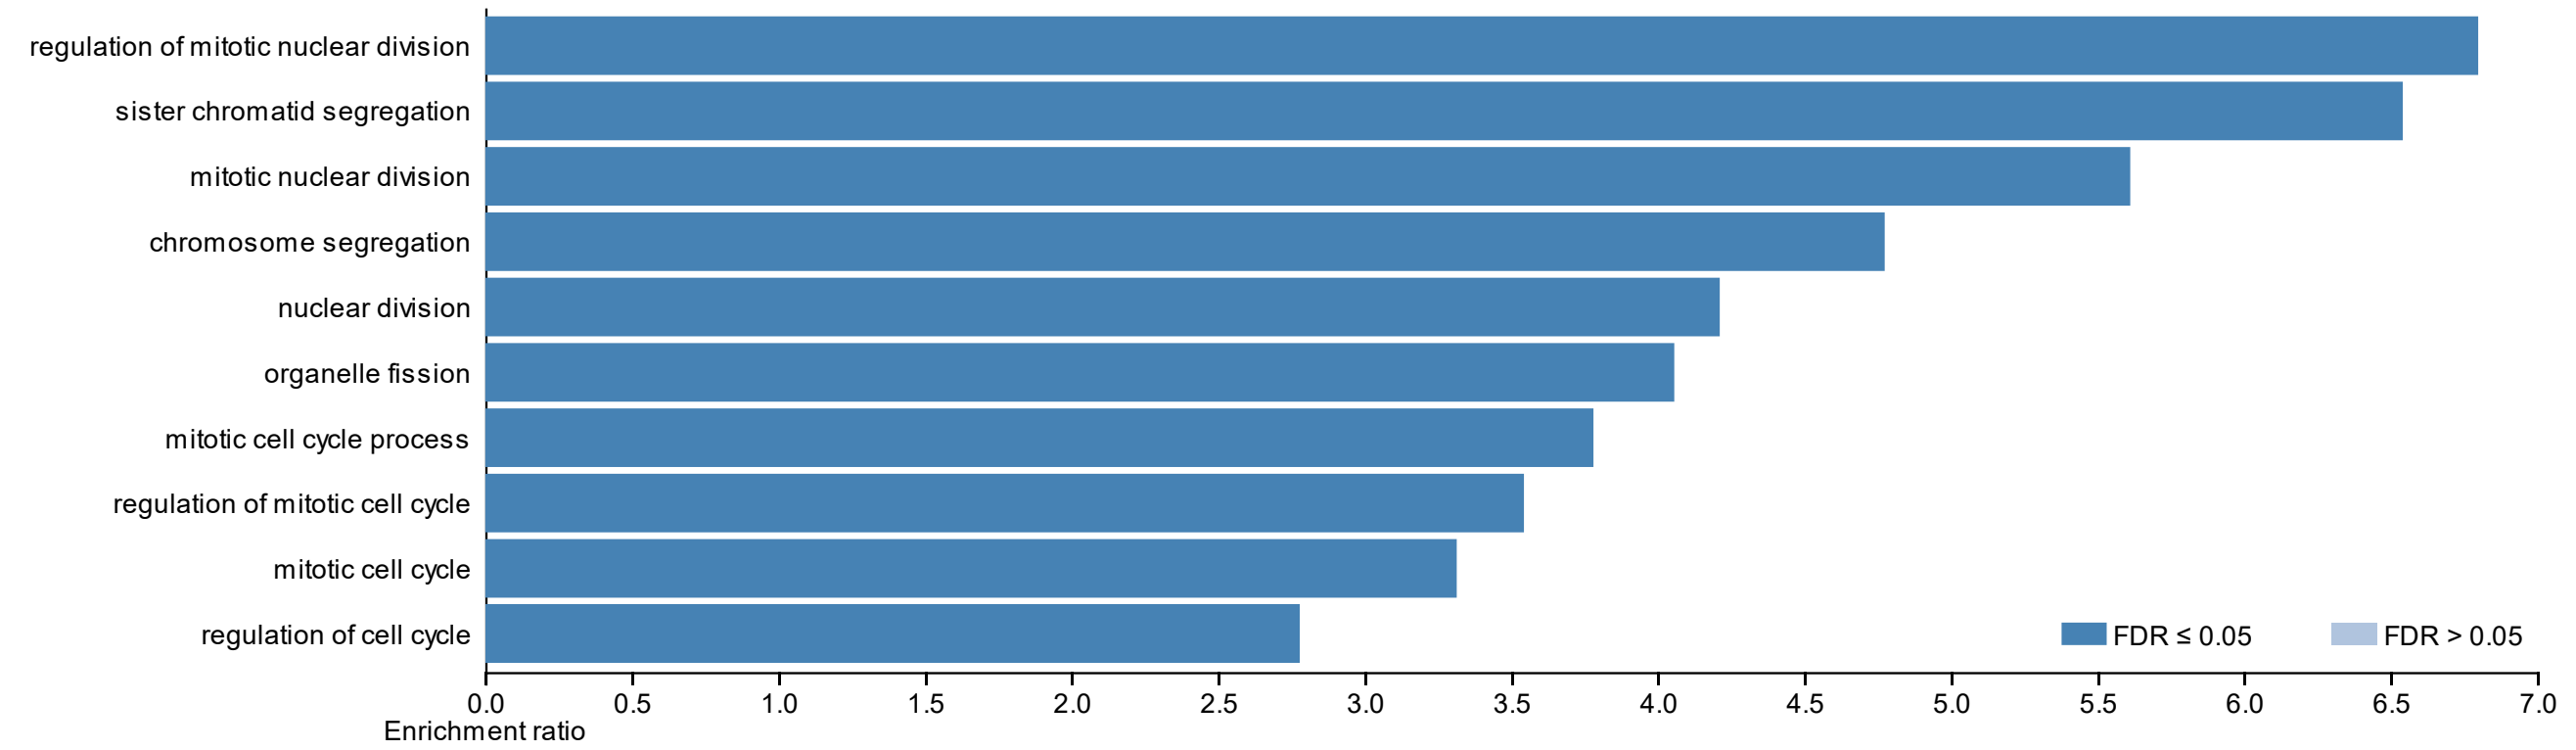**Top20 Enriched Gene Ontology Terms (Down-regulated Genes)**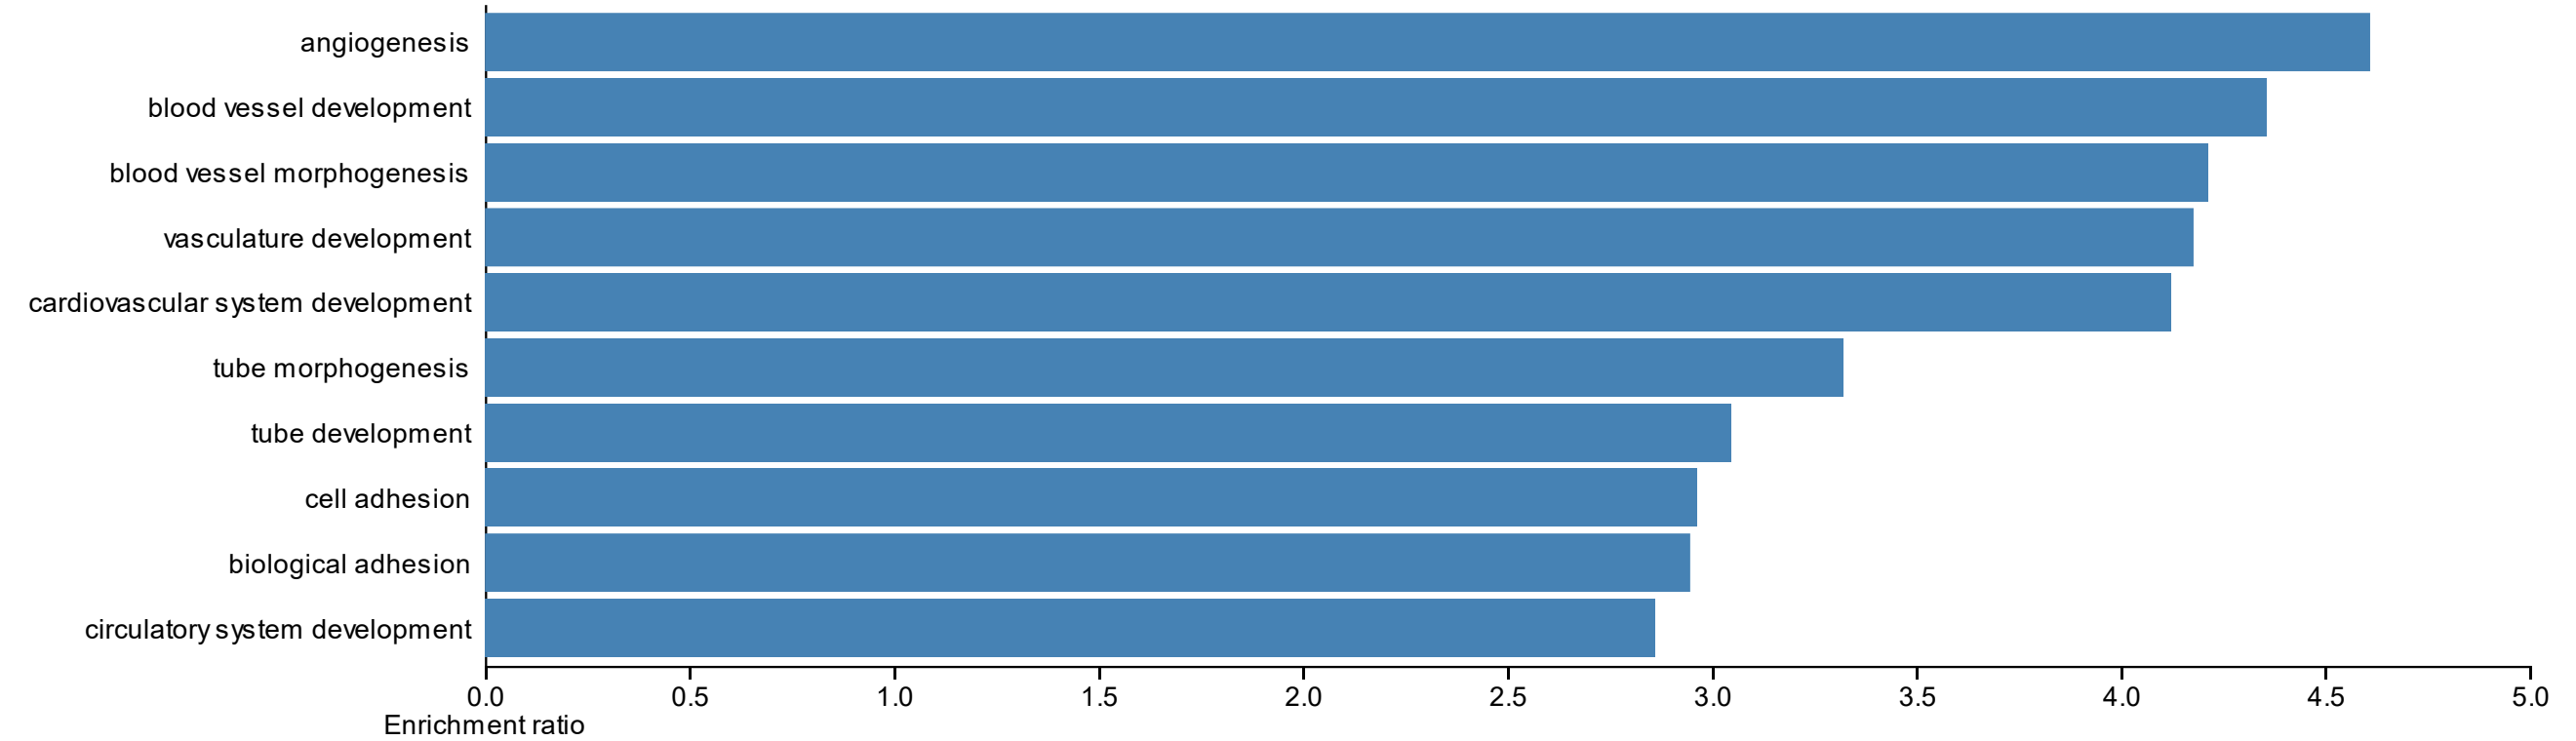

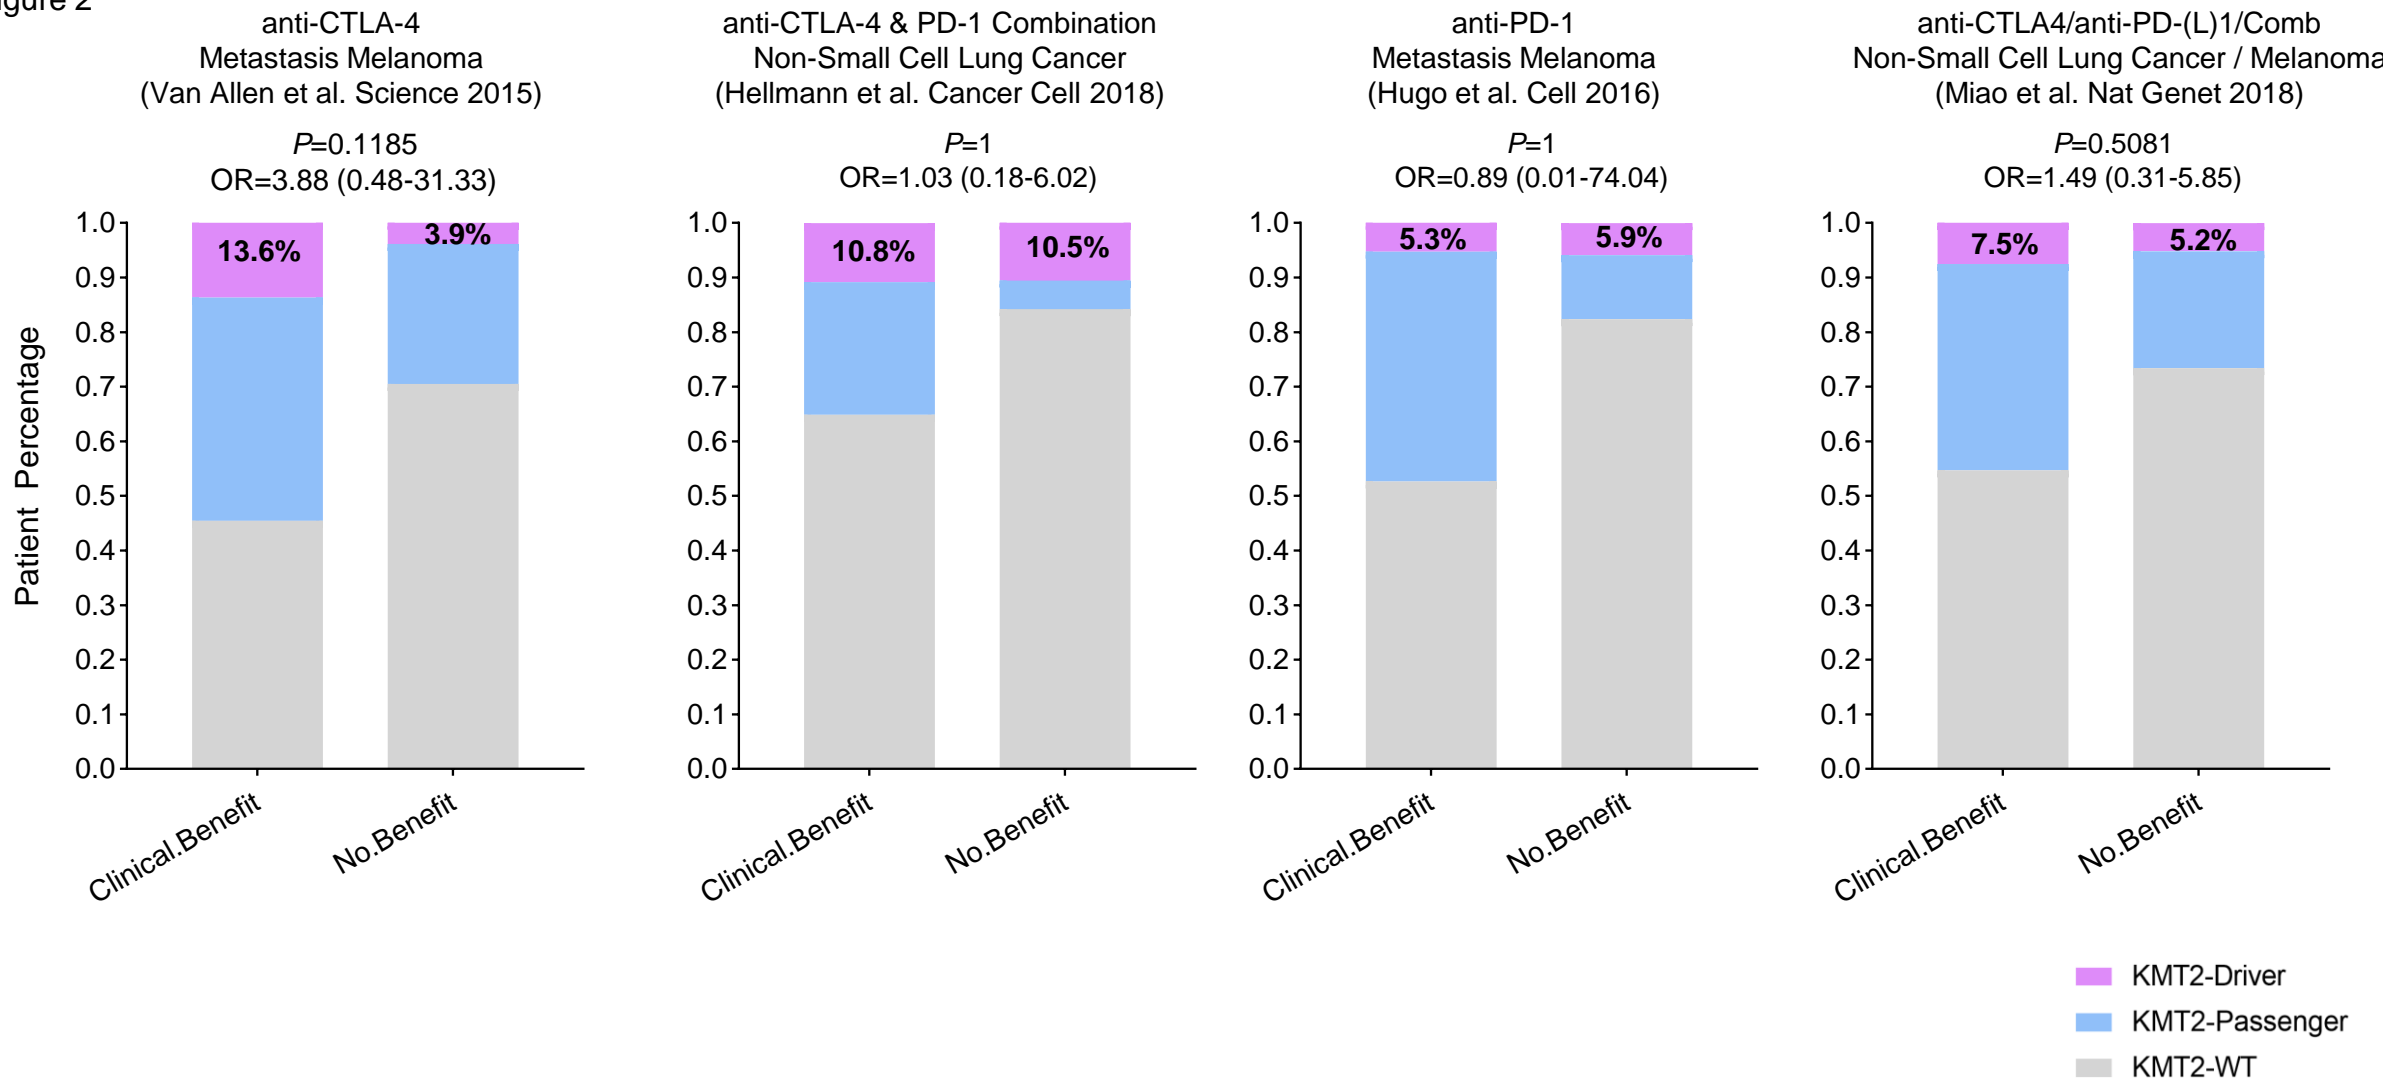

**A**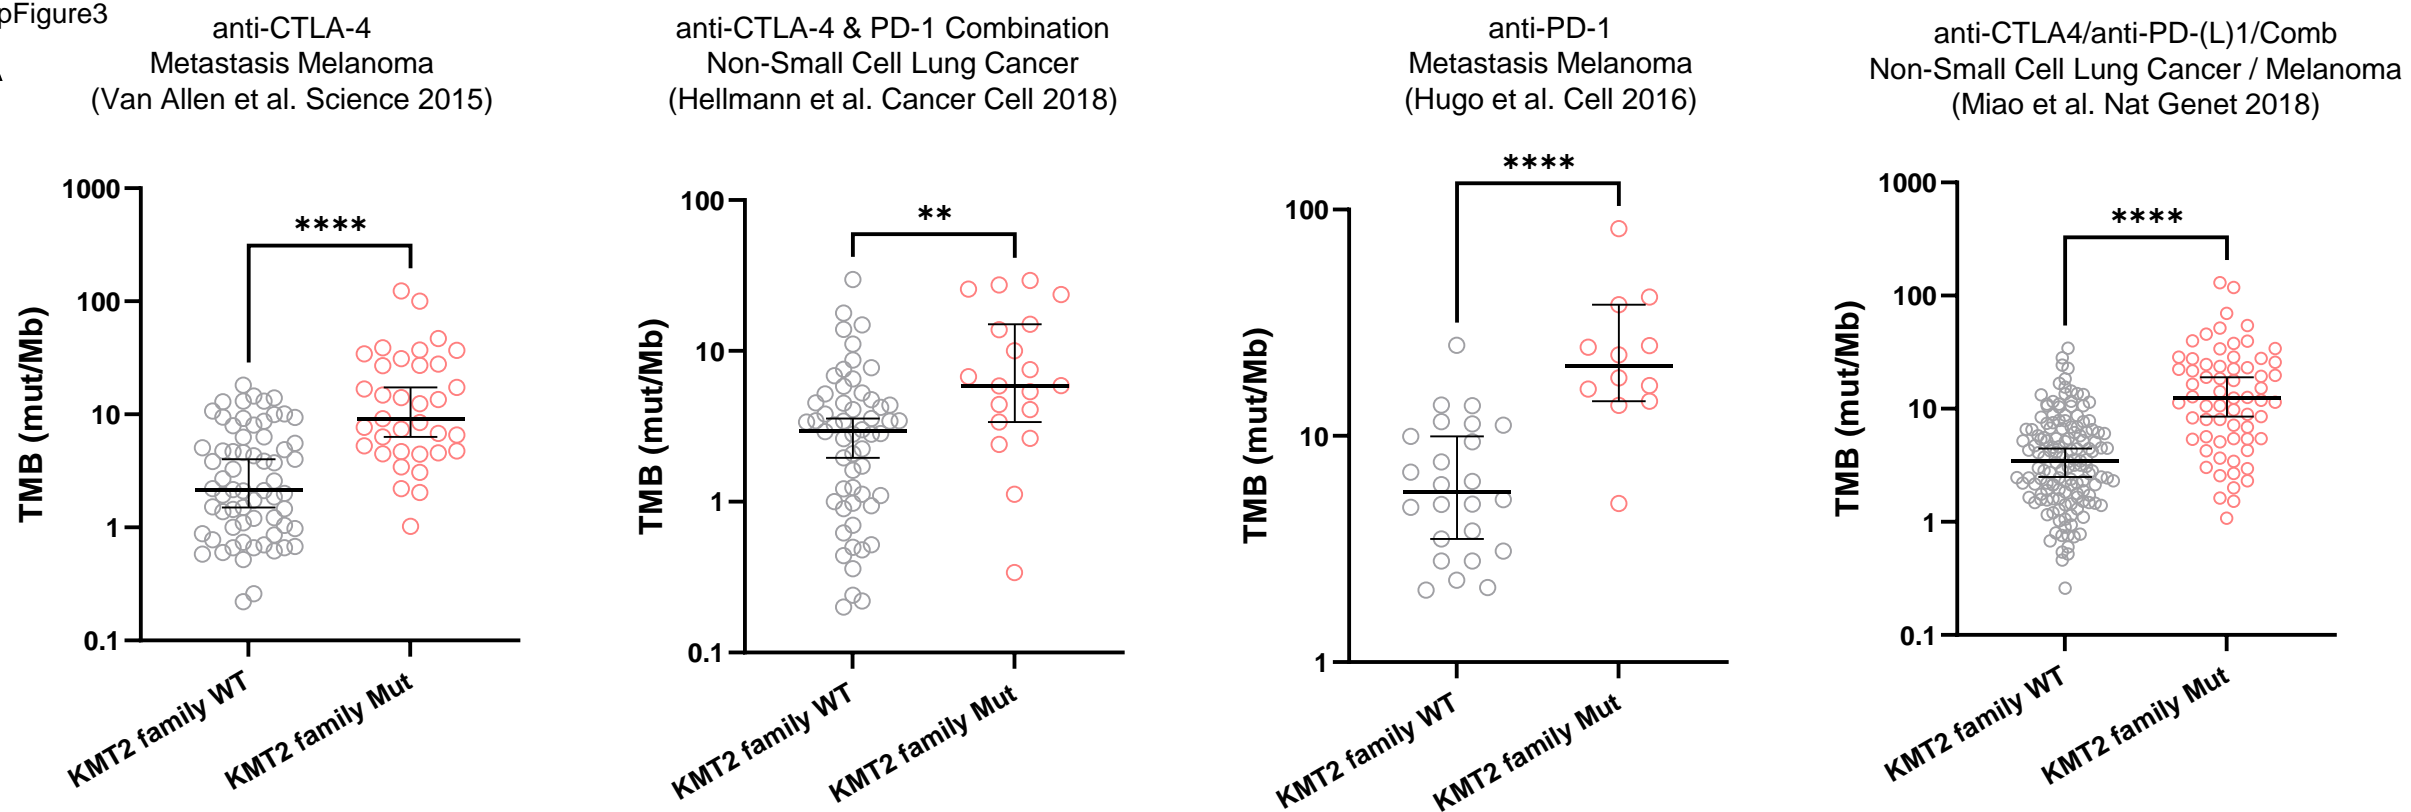**B**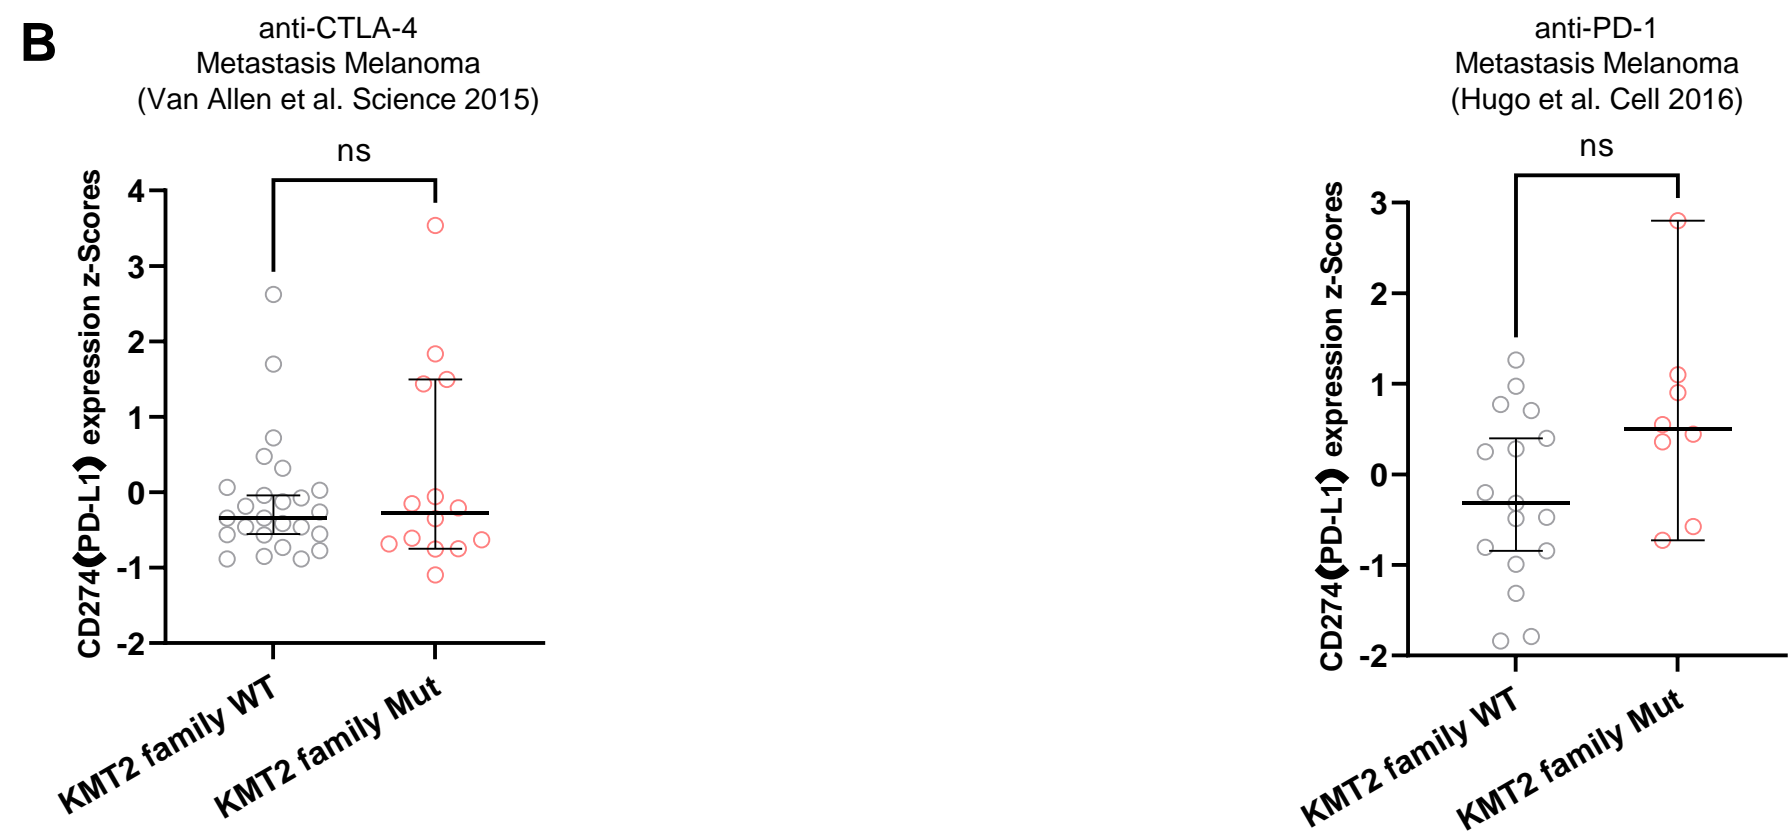

anti-CTLA-4  
Metastasis Melanoma  
(Van Allen et al. Science 2015)

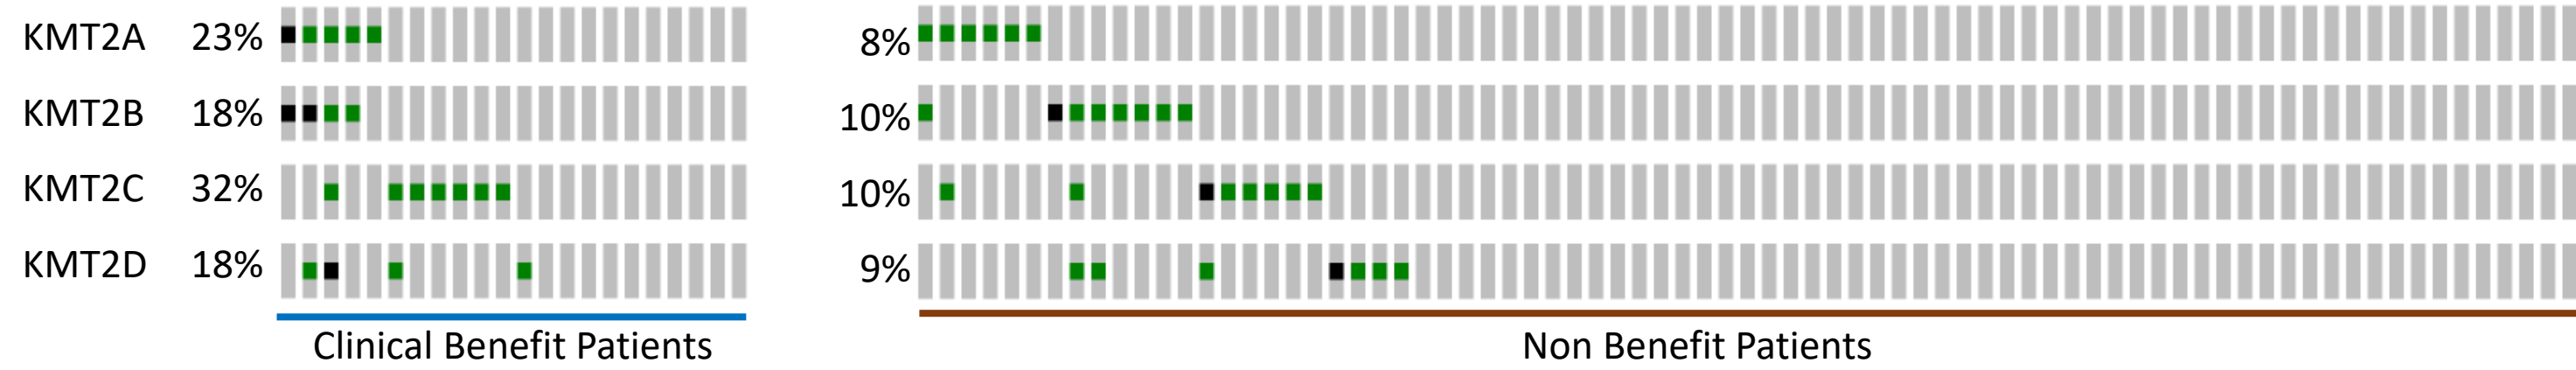

anti-CTLA-4 & PD-1 Combination  
Non-Small Cell Lung Cancer  
(Hellmann et al. Cancer Cell 2018)

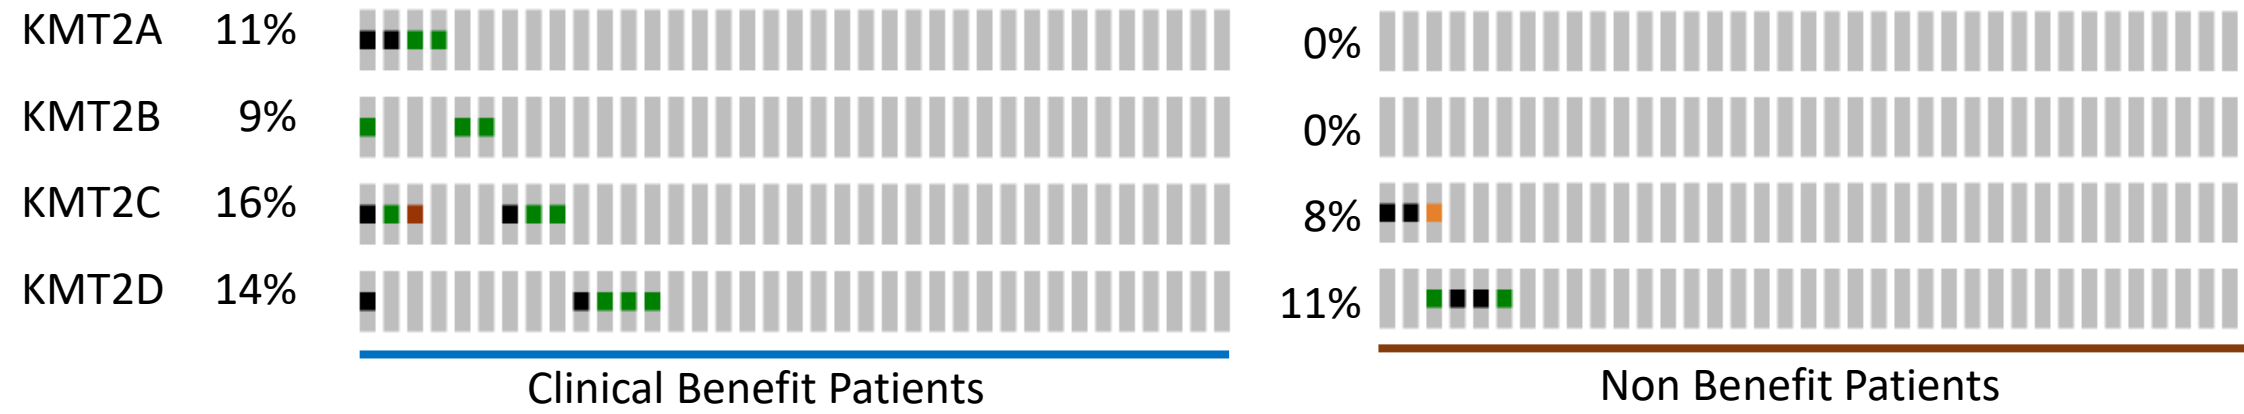

anti-PD-1  
Metastasis Melanoma  
(Hugo et al. Cell 2016)

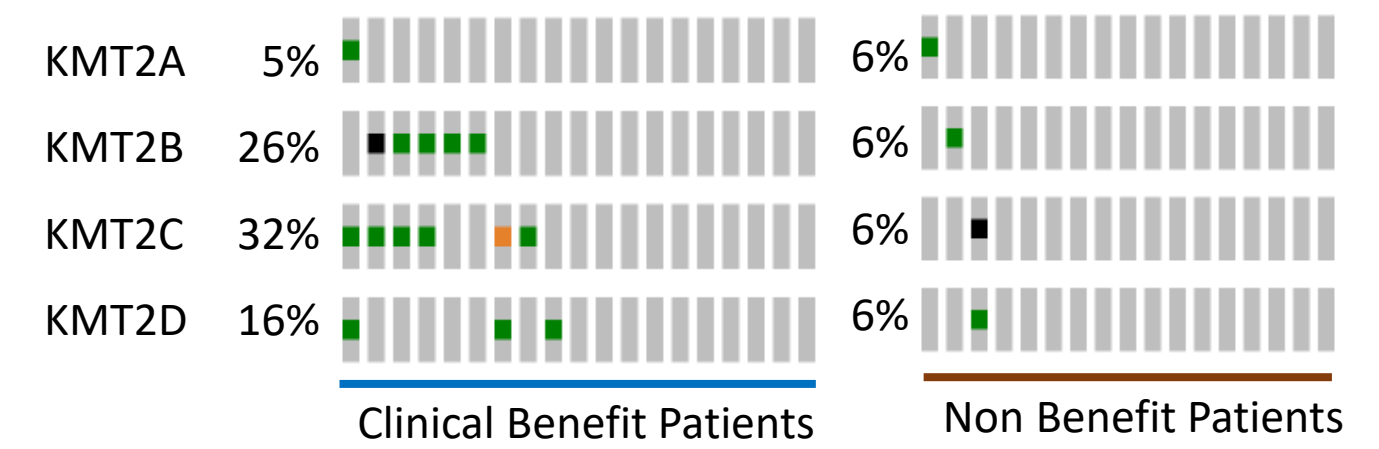

anti-CTLA4/anti-PD-(L)1/Comb  
Non-Small Cell Lung Cancer / Melanoma  
(Miao et al. Nat Genet 2018)

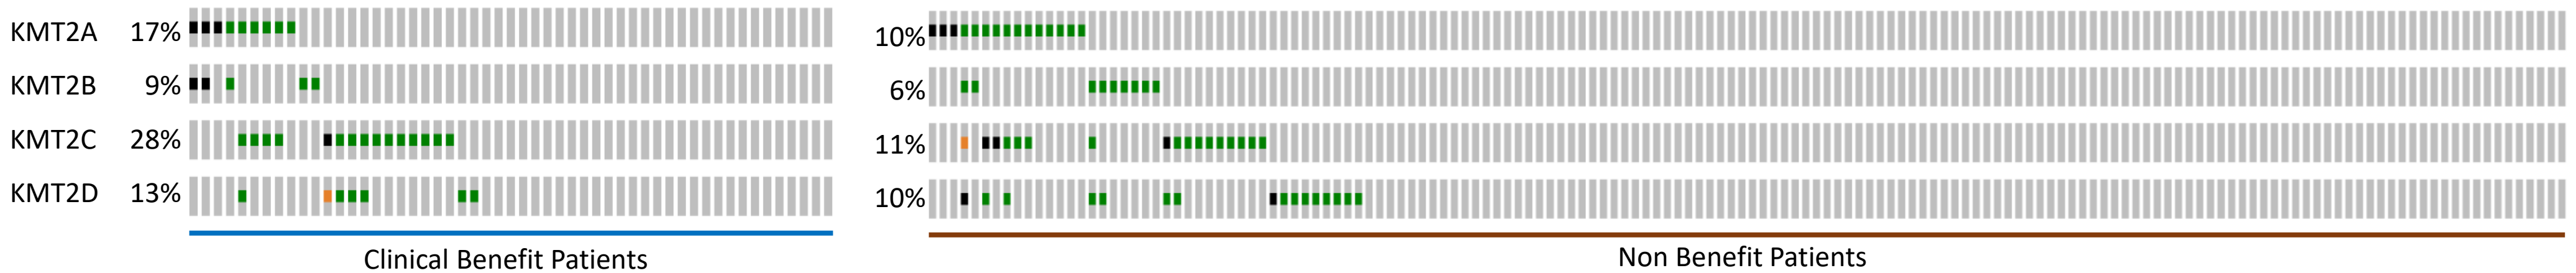

Supplement: MOESM3 [file 18921300]
